# Supplementary material for: 3D-hierarchical SnS2micro/nano-structures: controlled synthesis, formation mechanism and lithium ion storage performances
Source: Royal Society of Chemistry journal article supplement (doi:10.1039/c1ce05950e), 2011-12-05
Supplement: c1ce05950e.pdf [file c1ce05950e.pdf]

Supporting information for:

## 3D-Hierarchical SnS<sub>2</sub> Micro/nano-Structures: Controlled Synthesis, Formation mechanism and Lithium ion storage performances

Jiantao Zai, Xuefeng Qian,\* Kaixue Wang, Chao Yu, Liqi Tao, Yingling Xiao and Jiasheng Chen<sup>a</sup>

School of Chemistry and Chemical Engineering

State Key Laboratory of Metal Matrix Composites

Shanghai Jiao Tong University, Shanghai, 200240 (P. R. China)

E-mail: xfqian@sjtu.edu.cn

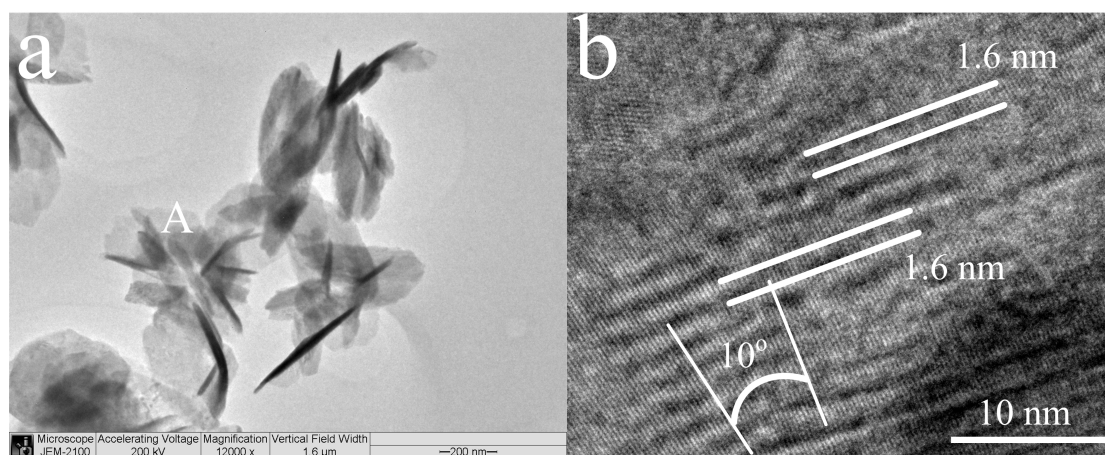

**Fig. S1** a, TEM images of another assemblies of SAMPLE 2; b, magnified image of area A marked in a. The 10° angle between the lattice fringes with a new space of 1.6 nm.

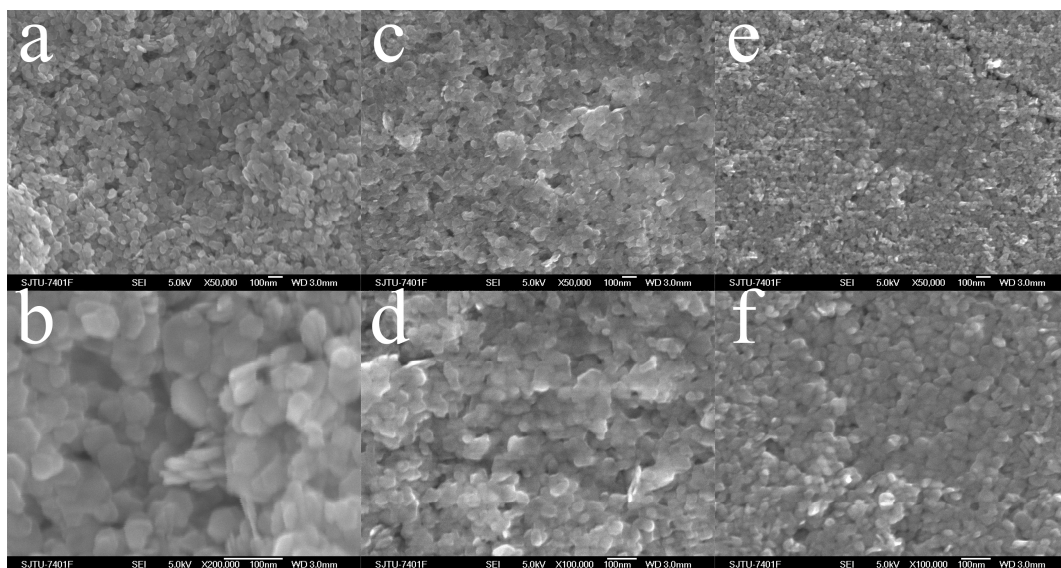

**Fig. S2** The FESEM images of the obtained SnS<sub>2</sub> nanoplates synthesized by a simple hydrothermal process with 0.01 mol/L SnCl<sub>4</sub> and a certain amount of thioacetamide (TAA): a-b, 3.2 mmol, Sn:TAA=1:4; c-d, 6.4 mmol, Sn:TAA=1:8; e-f, 12.8 mmol, Sn:TAA=1:16.

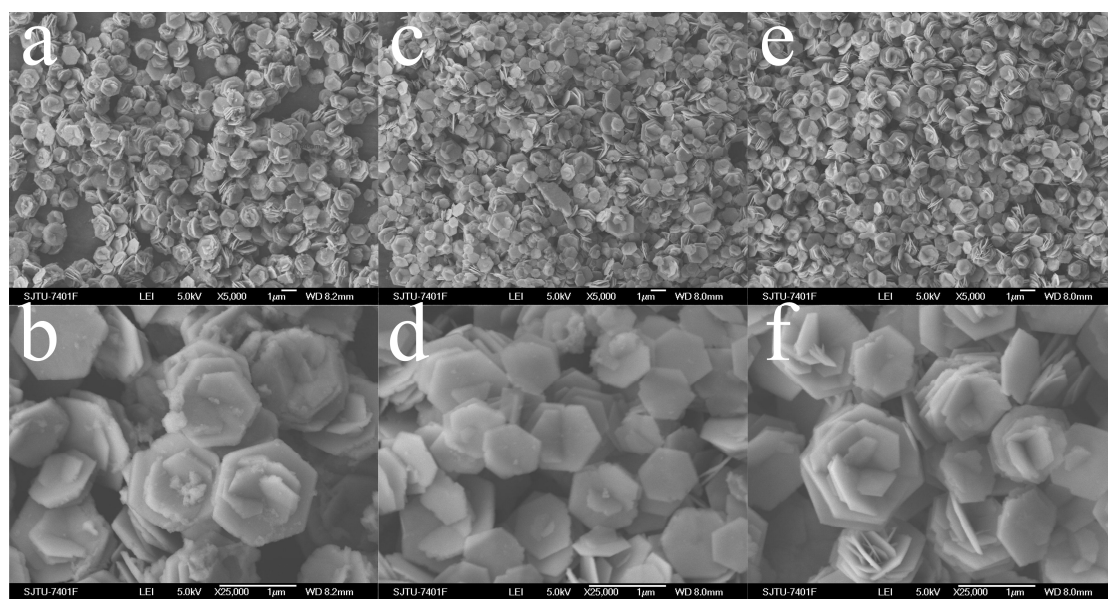

**Fig. S3** The FESEM images of the obtained SnS<sub>2</sub> micro-flowers synthesized by a simple hydrothermal process with 0.01 mol/L SnCl<sub>4</sub> and a certain amount of thiourea (Tu): a-b, 3.2 mmol, Sn:Tu=1:4; c-d, 6.4 mmol, Sn:Tu=1:8; e-f, 12.8 mmol, Sn:Tu=1:16.
